# Supplementary material for: Masculinizer and Doublesex as Key Factors Regulate Sexual Dimorphism in Ostrinia furnacalis
Source: MDPI journal article supplement (doi:10.3390/cells11142161), 2022-07-11
Supplement: s1 [file s1]

A

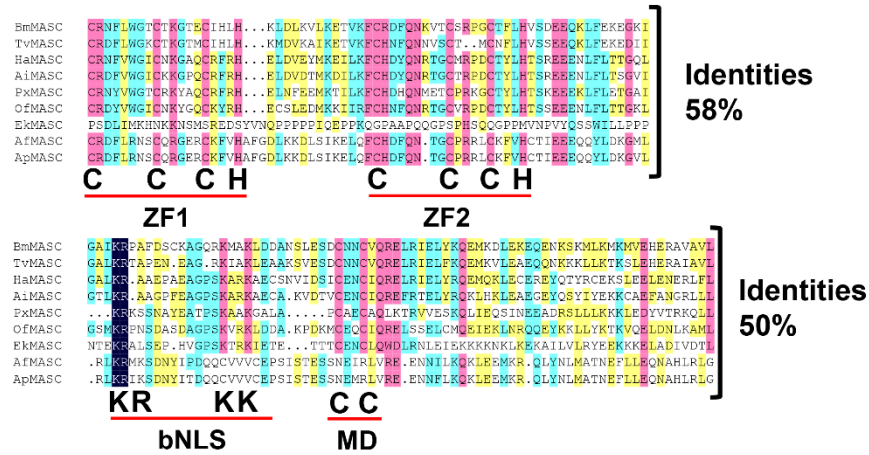

B

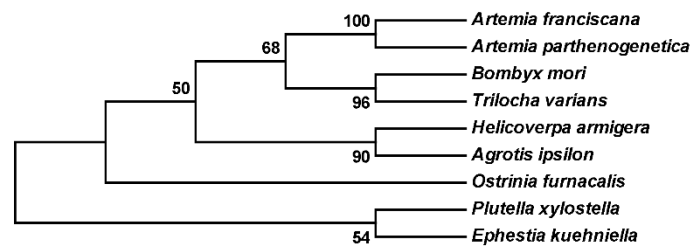

**Fig.S1** Phylogenetic analysis of the *OfMasc* gene. (A) Multiple alignment of MASC protein sequences from nine species including *Bombyx mori* (BmMASC, Accession: BAO79517.1), *Trilocha varians* (TvMASC, Accession: BAS02075.1), *Helicoverpa armigera* (HaMASC, Accession: QCD63870.1), *Agrotis ipsilon* (AiMASC, Wang et al. 2019), *Plutella xylostella* (PxMASC, Harvey-Samuel et al. 2020), *Ostrinia furnacalis* (OfMASC, Accession: BAS02074.1), *Ephestia kuehniella* (EkMASC, Accession: QXE45293.1), *Artemia franciscana* (AfMASC, Accession: ARB66312.1), and *Artemia parthenogenetica* (ApMASC, Accession: ARB66313.1). The highly conserved regions are highlighted by capital letters, including CCCH-type zinc fingers (ZF), the bipartite nuclear localization signal (bNLS), and the masculinization domain (MD). (B) Phylogenetic relationships between the molecular phylogenetic analyses were conducted using the neighbor-joining method and MEGA5.1. Bootstrap values were obtained over 1000 replications.

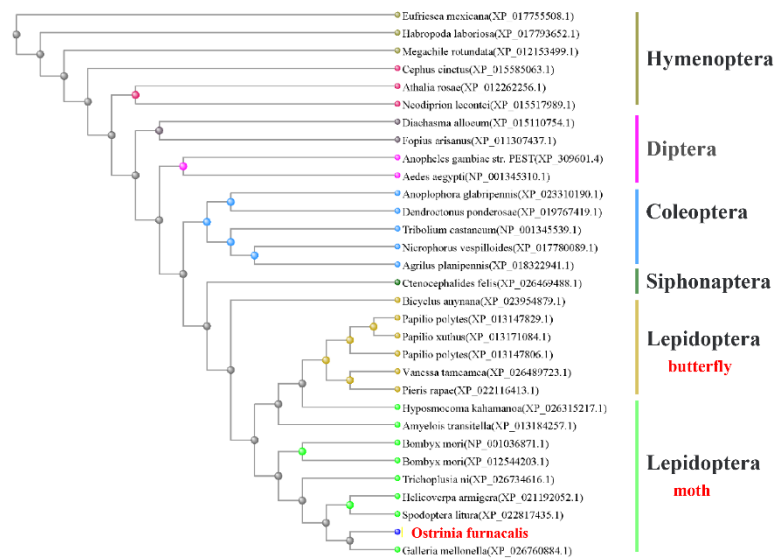

**Fig.S2** Phylogenetic relationship of insect *dsx* genes, generated using NCBI BLAST program.

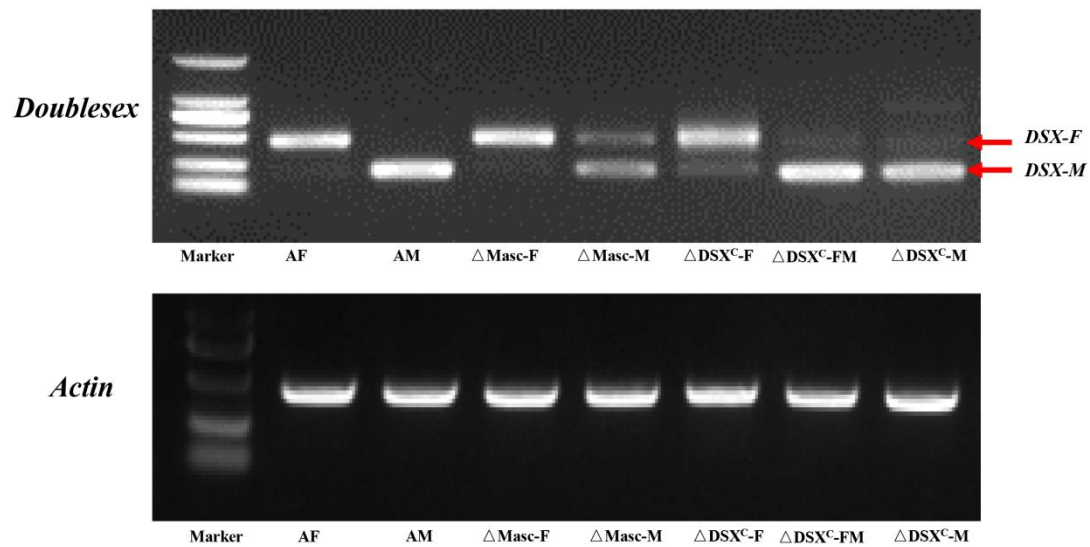

**Fig.S3** The splicing patterns of *Ofdsx* were examined by RT-PCR in wild-type and mutant insects. The red arrows indicate male- and female-type splicing of *Ofdsx*. The *O. furnacalis* actin gene was used as an internal control. Adult female (AF); adult male (AM).

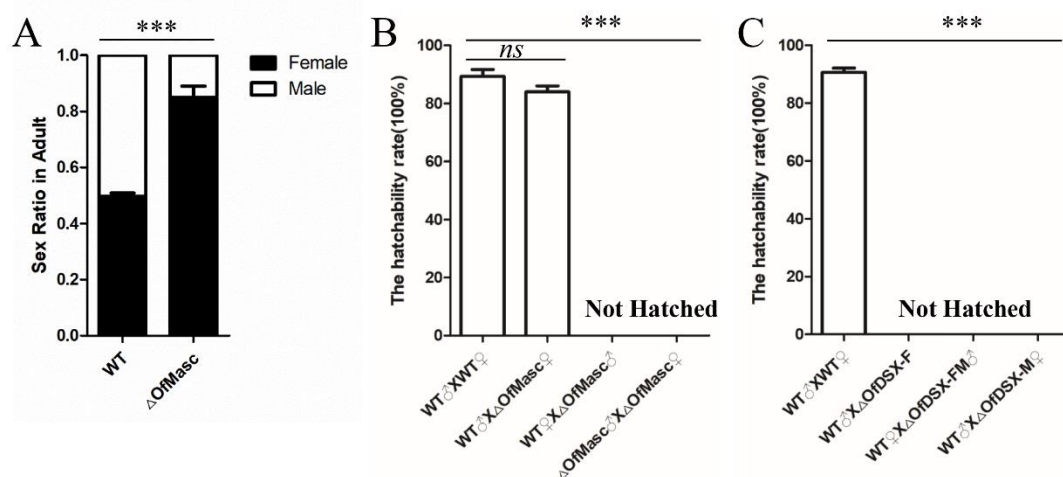

**Fig.S4** The sex ratio difference in *OfMasc* mutants, and the fertility of *OfMasc* and *Ofdsx* mutants. (A) Disruption of the *OfMasc* gene induced an imbalance in the sex ratio. All data represent the average of three independent experiments  $\pm$  SEM. (B) The hatchability rate when *OfMasc* mutants mated with each other. n.s., not significant; The asterisks (\*\* or \*\*\*) indicate significant differences ( $P < 0.01$  or  $P < 0.001$ ) between adult mutants and the wild-type individuals; these were assessed using a two-tailed *t*-test. (C) The hatchability rate when *Ofdsx* mutants mated with each other. The asterisks (\*\* or \*\*\*) indicate the significant differences ( $P < 0.01$  or  $P < 0.001$ ) between adult mutants and wild-type individuals; these were assessed using a two-tailed *t*-test.

|        | sgRNA/Cas9<br>concentration<br>(ng/ $\mu$ L) | Injected<br>eggs | Hatched<br>larvae (%) | Live pupae<br>(F/M) | Live<br>adults<br>(F/M) | Mutation<br>phenotype<br>of adults<br>(F/M/FM) |
|--------|----------------------------------------------|------------------|-----------------------|---------------------|-------------------------|------------------------------------------------|
| OfMasc | 150/300                                      | 355              | 121(34%)              | 76(65/11)           | 58(50/8)                | 6(0/6/0)                                       |
| Ofdsx  | 150/300                                      | 468              | 215(46%)              | 123(58/65)          | 79(32/37)               | 28(9/12/7)                                     |
| ddH2O  | -                                            | 143              | 101(71%)              | 66(30/36)           | 48(23/25)               | -                                              |

Table S1 Mutagenesis of *OfMasc* and *Ofdsx* induced by Cas9/sgRNA
